# Supplementary material
Source: PubMed Central journal article supplement (PMC4288864)

**Persistence and toxin production by *Clostridium difficile* within human intestinal organoids results in disruption of epithelial paracellular barrier function.**

Jhansi L. Leslie, Sha Huang, Judith S. Opp, Melinda S. Nagy, Masayuki Kobayashi, Vincent B. Young, Jason R. Spence

**Supplemental Information:**

**Supplemental Table 1 - Antibodies:**

| <b>Primary Antibodies</b>              | <b>Vendor &amp; Catalog #</b>              | <b>Application &amp; dilution</b> |
|----------------------------------------|--------------------------------------------|-----------------------------------|
| Mouse anti-ZO-1                        | Life Technologies<br>#33-9100              | IF: 1:100                         |
| Rabbit anti-Occludin                   | Life Technologies<br>#71-1500              | IF: 1:250                         |
| Mouse anti-E-Cadherin                  | BD Biosciences<br>#610651                  | IF: 1:500                         |
| Mouse anti-Acetylated Tubulin          | Sigma-Aldrich<br>#T7451                    | IF: 1:1,000                       |
| Alexa Fluor 546 phalloidin             | Life Technologies<br>#A22283               | IF: 1:100                         |
| Rabbit anti-Cleaved Caspase-3 (Asp175) | Cell Signaling<br>#9664                    | IF: 1:500                         |
| <b>Secondary Antibodies</b>            | <b>Vendor &amp; Cat#</b>                   | <b>Application &amp; dilution</b> |
| Donkey Anti-Mouse IgG-Cy3              | Jackson ImmunoResearch Lab<br>#715-165-150 | IF: 1:1,000                       |
| Donkey Anti-Rabbit IgG-Alexa Fluor 488 | Jackson ImmunoResearch Lab<br>#711-545-152 | IF: 1:1,000                       |
| Donkey anti-Mouse IgG-Alexa Fluor 647  | Jackson ImmunoResearch Lab<br>#715-605-150 | IF: 1:1,000                       |

## **Supplemental Figure Legends:**

### **Supplemental Figure 1: “Outside-in” barrier function experiment.**

To confirm that HIOs had a paracellular barrier function, FD4 was added to the media outside of the HIOs. A) Schematic of the barrier function assay. Following treatment, FD4 is added to the media containing the HIOs. HIOs with intact epithelium prevent the diffusion of FD4 into the lumen whereas those with a disrupted epithelium cannot exclude FD4. B) Brightfield images indicate the location of the HIOs. Untreated HIOs exclude FD4, EGTA HIOs treated lose barrier function and appear green.

### **Supplemental Figure 2: Toxin activity of filtered supernatants. *C. difficile***

culture supernatant was filtered to remove the bacteria and toxin activity was assessed using a Vero cell cytotoxicity assay. The culture filtrate from strain VPI 10463 had detectable cytotoxicity (black bar), however this level was not sufficient to disrupt HIO barrier function when injected into HIOs. Strain F200 (the nontoxigenic strain) had no cytotoxicity. The plot is of the mean with the SD of two independent experiments.

### **Supplemental Figure 3: Toxin activity of purified TcdA and TcdB used in**

**injections.** Purified toxin was tested in cell cytotoxicity assay. At the same concentration, TcdB and TcdA had similar activity on Vero cells.

**Supplemental Figure 4: Loss of barrier function following treatment with TcdA or TcdB is not due to caspase-3 mediated apoptosis.** Controls, EGTA treated, and 400ng/ml of TcdA or TcdB treated HIOs were stained for cleaved caspase-3 an indicator of apoptotic cell death. Treatment with the cytokines TNF-alpha and INF-gamma induces massive cell death and serves as a positive control.

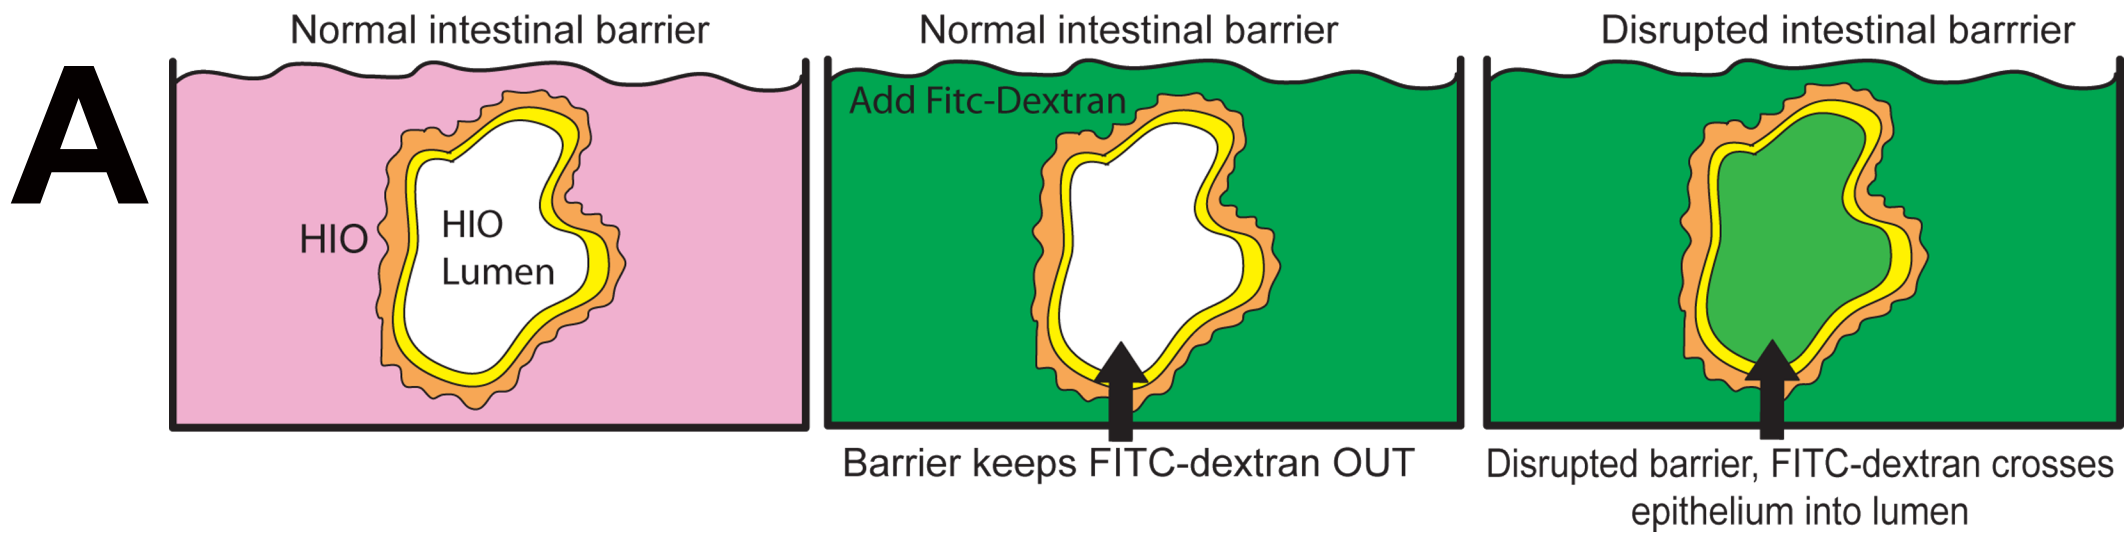

**B**      **Brightfield**      **Fluorescent**

Control

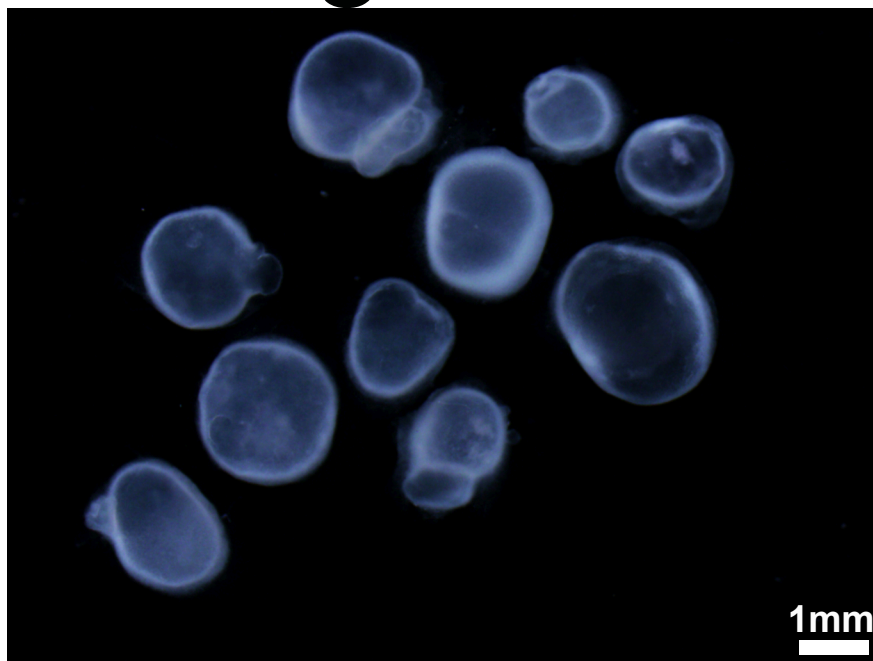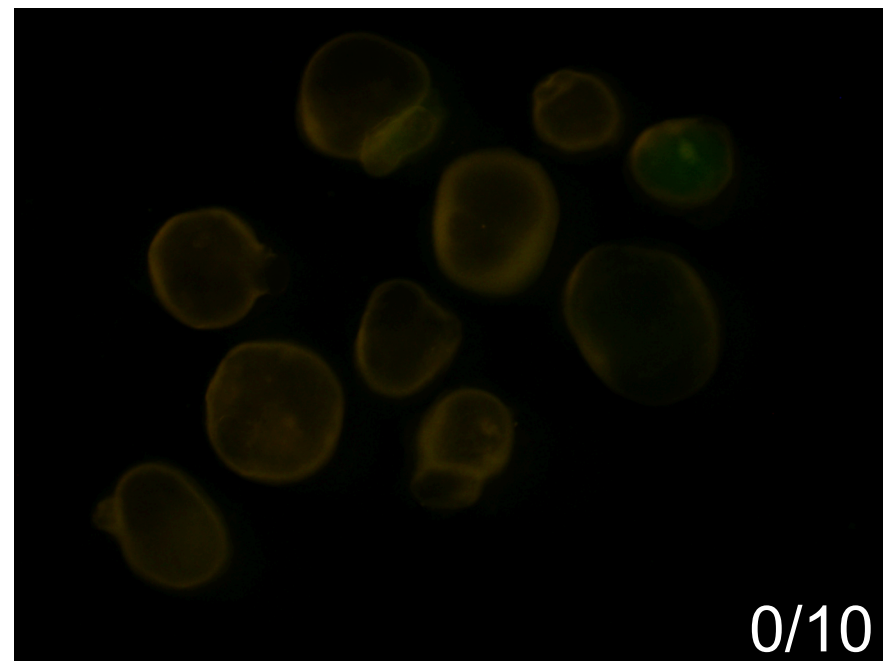

EGTA

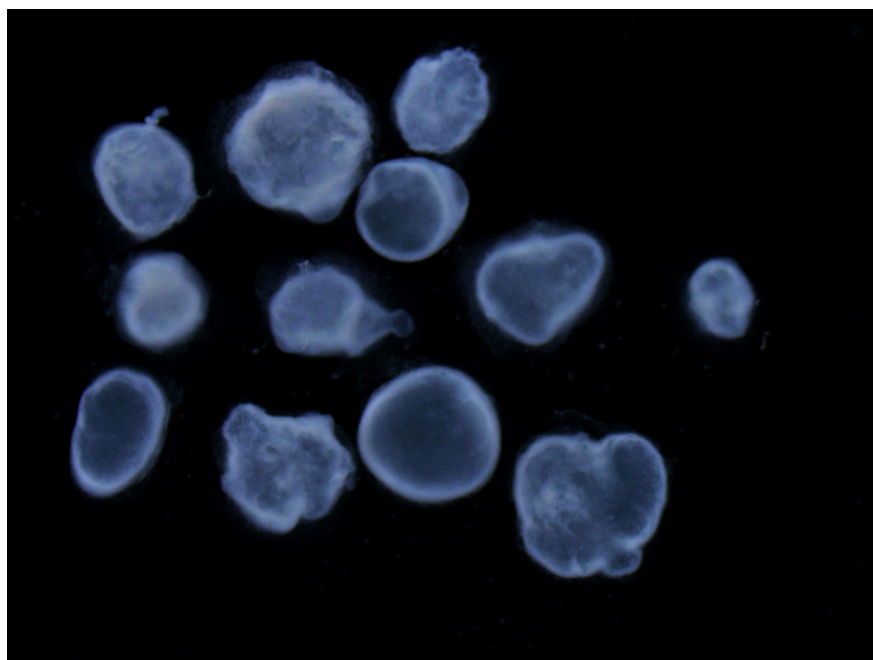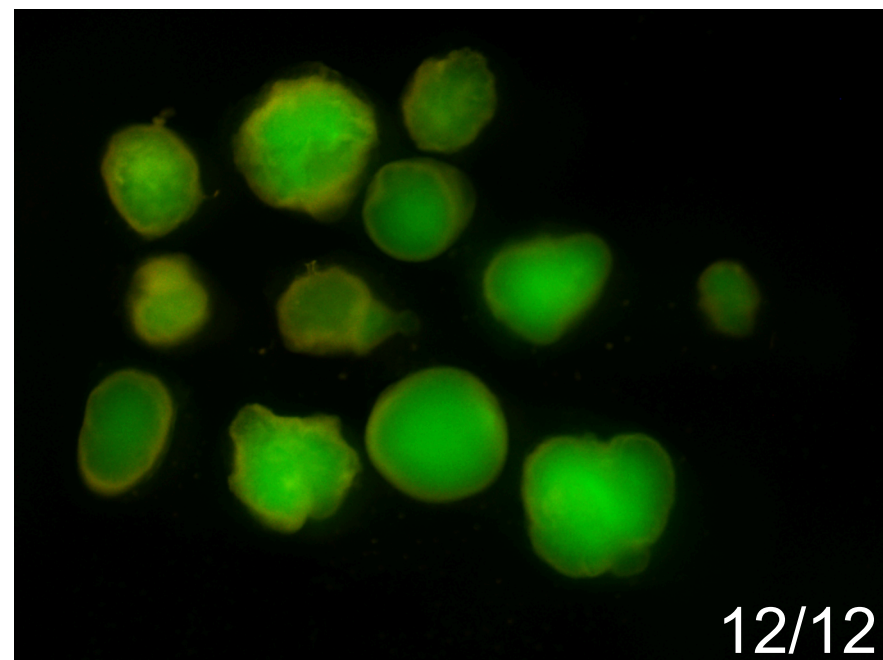

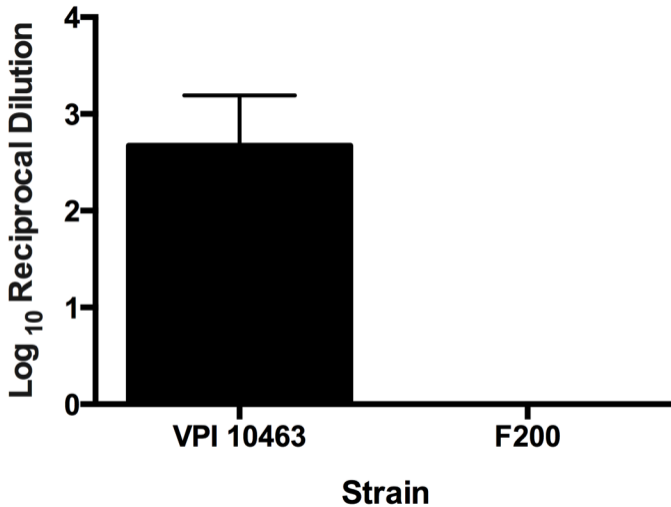

**Toxin Activity  
(Log<sub>10</sub> of the Reciprocal Dilution  
of Toxin)**

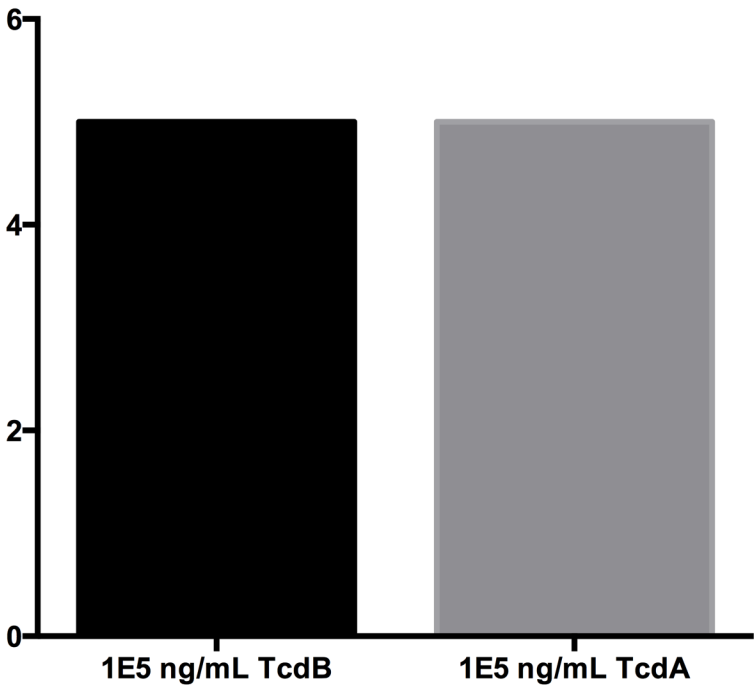

**Control**

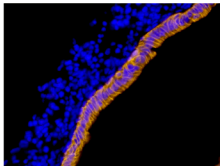

**EGTA**

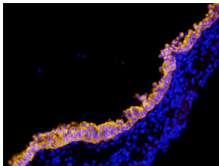

**TcdA 400ng/mL**

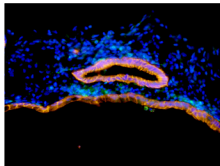

**TcdB 400ng/mL**

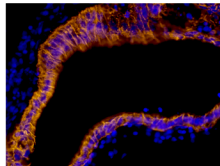

**TNF $\alpha$  1000ng/mL  
INF $\gamma$  1000ng/mL**

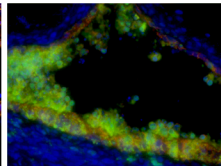

Supplement: IAI.02561-14_zii999091007so1.pdf [file IAI.02561-14_zii999091007so1.pdf]
